# Supplementary material
Source: Springer Nature journal article supplement (https://www.springermedizin.de/resource/supplementary/12984_2011_425_MOESM9_ESM.pdf/9605974)

**a) Flexion**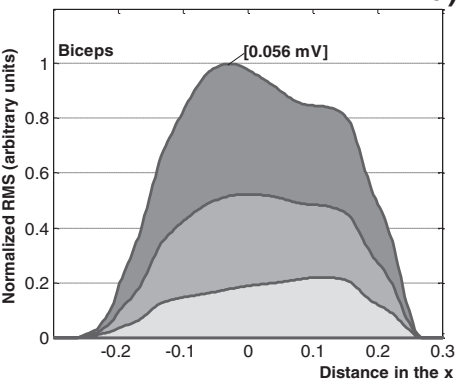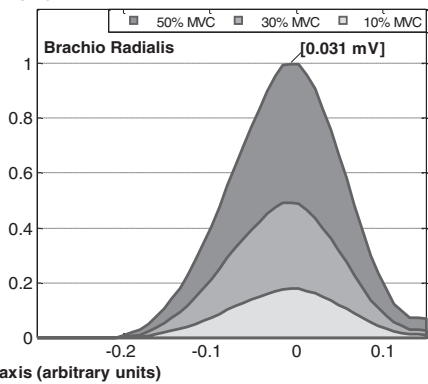**b) Extension**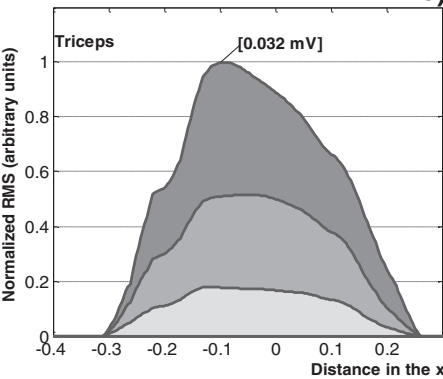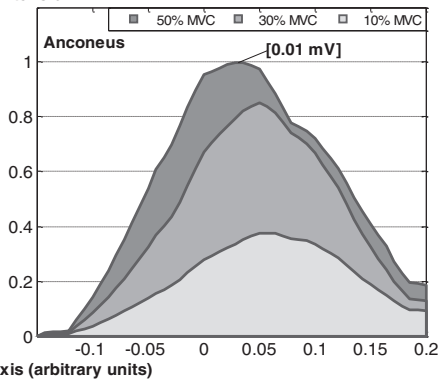**c) Supination**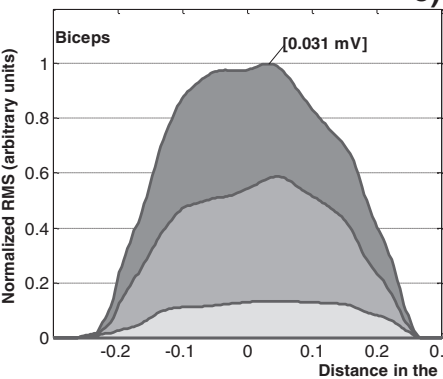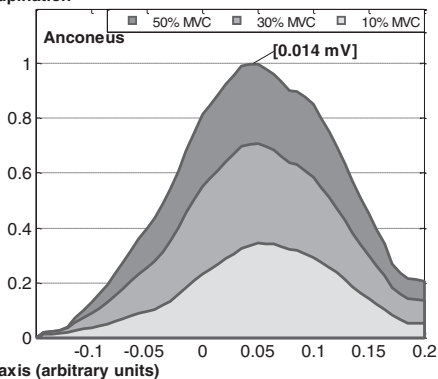**d) Pronation**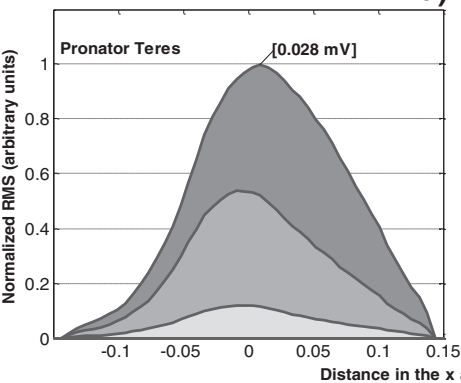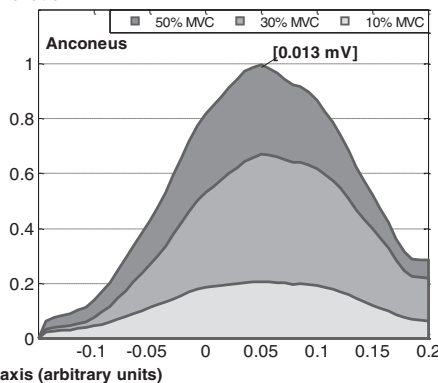

Supplement: MOESM9 [file 9605974]
